# Supplementary material for: Combined Inhibition of Hedgehog and HDAC6: In Vitro and In Vivo Studies Reveal a New Role for Lysosomal Stress in Reducing Glioblastoma Cell Viability
Source: MDPI journal article supplement (doi:10.3390/ijms24065771), 2023-03-17
Supplement: s1 [file s1]

**Table S1. List of antibodies and their relative dilution.** Wester-blot (WB), immunohistochemistry (IHC) and immunofluorescence (IF) analyses.

| <b>Antibody</b>                           | <b>Brand</b>                                     | <b>Protocol</b> | <b>Dilution</b> | <b>Model</b>     |
|-------------------------------------------|--------------------------------------------------|-----------------|-----------------|------------------|
| Rabbit anti LC3A/LC3B                     | Immunological Sciences (Roma, Italy)             | WB<br>IHC       | 1:500<br>1:60   | U87-MG           |
| Rabbit anti LAMP1                         | Immunological Sciences (Roma, Italy)             | WB<br>IHC       | 1:100<br>1:500  | U87-MG           |
| Rabbit anti GAPDH                         | Santa Cruz Biotechnology (Santa Cruz, CA, USA)   | WB              | 1:1000          | U87-MG           |
| Mouse anti p-AKT                          | Cell Signaling (Danvers, MA, USA)                | WB              | 1:1000          | U87-MG           |
| Rabbit anti AKT                           | Cell Signaling (Danvers, MA, USA)                | WB              | 1:1000          | U87-MG           |
| Mouse anti p-ERK 1/2                      | Cell Signaling (Danvers, MA, USA)                | WB              | 1:1000          | U87-MG           |
| Rabbit anti ERK 1/2                       | Cell Signaling (Danvers, MA, USA)                | WB              | 1:1000          | U87-MG           |
| Goat anti-rabbit IgG-HRP                  | Immunological Sciences (Roma, Italy)             | WB              | 1:200           | U87-MG           |
| Goat anti-mouse IgG-HRP                   | Immunological Sciences (Roma, Italy)             | WB              | 1:5000          | U87-MG           |
| IgG anti-rabbit HiLyte Flour 488          | Thermo Fisher Scientific Inc. (Waltham, MA, USA) | IF              | 1:500           | U87-MG           |
| IgG anti-mouse Alexa Fluor 546            | Thermo Fisher Scientific Inc. (Waltham, MA, USA) | IF              | 1:7000          | U87-MG           |
| Mouse anti-GFP                            | Sigma-Aldrich (Saint Louis, MO)                  | IF              | 1:1000          | Zebrafish        |
| Rabbit anti-SQSTM1/p62                    | Immunological Sciences (Roma, Italy)             | IF<br>WB        | 1:200<br>1:1000 | Zebrafish U87-MG |
| Alexa 488-conjugated goat anti-mouse IgG  | Invitrogen Life Technologies (Carlsbad, CA, USA) | IF              | 1:400           | Zebrafish        |
| Alexa 546-conjugated goat anti-rabbit IgG | Invitrogen Life Technologies (Carlsbad, CA, USA) | IF              | 1:400           | Zebrafish        |

**A**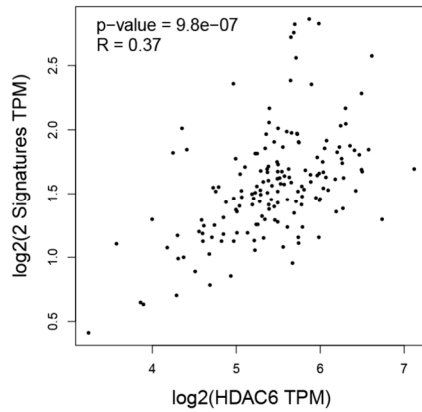**B**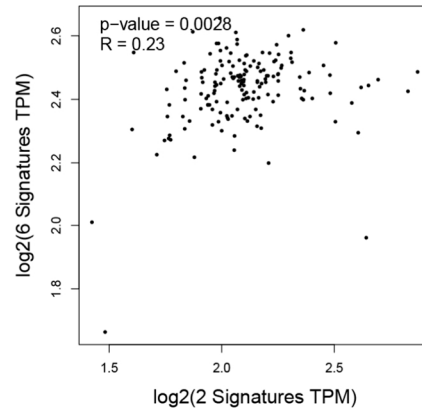

**Supplementary Figure S1. *Hh*, *HDAC6* and sphingolipids enzyme correlation in GBM datasets and U87-MG.** A) GEPIA-2 correlation analyses between the expression levels of *HDAC6* (HDAC6 TPM) and *GLI1* and *PTCH1* (2 signature TPM). B) correlation analyses between the expression levels of *HDAC6* and *GLI1* (2 signature TPM) and expression of the genes of sphingolipid metabolism (6 signature TPM; *CERS1*, *SGMS1*; *SPHK1*; *SPTLC1*; *UGCG*; *SGPP1*). GBM: Glioblastoma; TPM: transcript per millions. Correlation analyses: Spearman correlation. \*\*\* $p < 0.001$ .

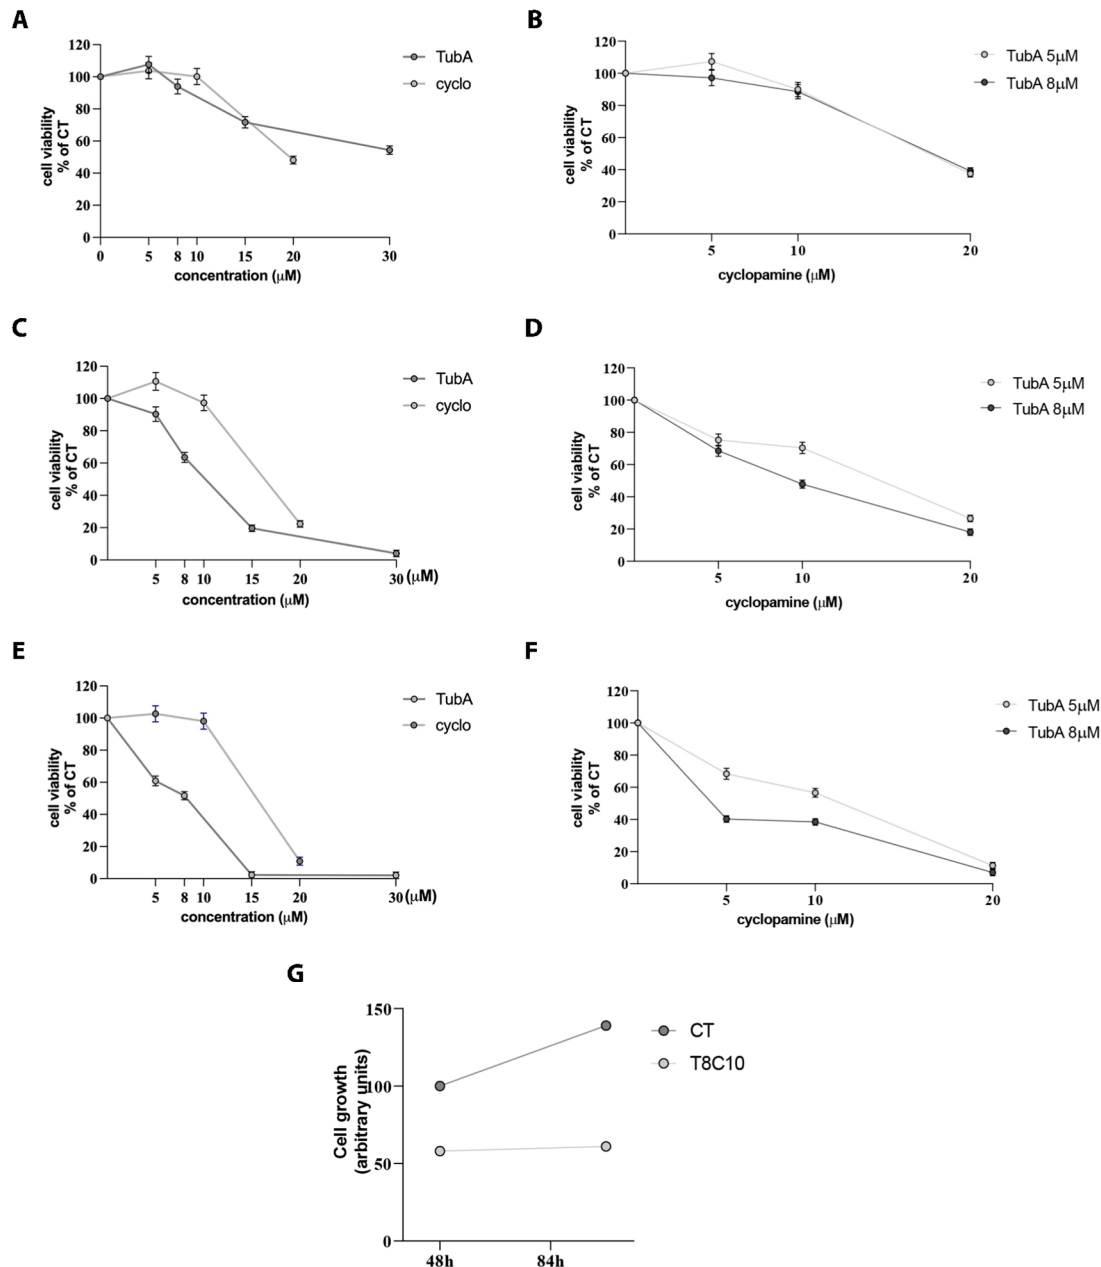

**Supplementary Figure S2. Setting conditions for TubA and cyclo administration in U87-MG cells:** Effects of TubA and cyclo on U87-MG cells viability alone (**A**, **C**, **E**) and in combination (**B**, **D**, **F**) after 24 h (**A** and **B**), 48h (**C** and **D**) and 72h (**E** and **F**) of treatment. **G**) Effect of 48h combined treatment with 8 μM TubA and 10 μM cyclo following 24h treatment withdrawal on cell viability. Data are presented as cell growth (arbitrary units, A.U.)  $\pm$  standard deviation, at each time point. TubA: TubastatinA; cyclo:cyclopamine.

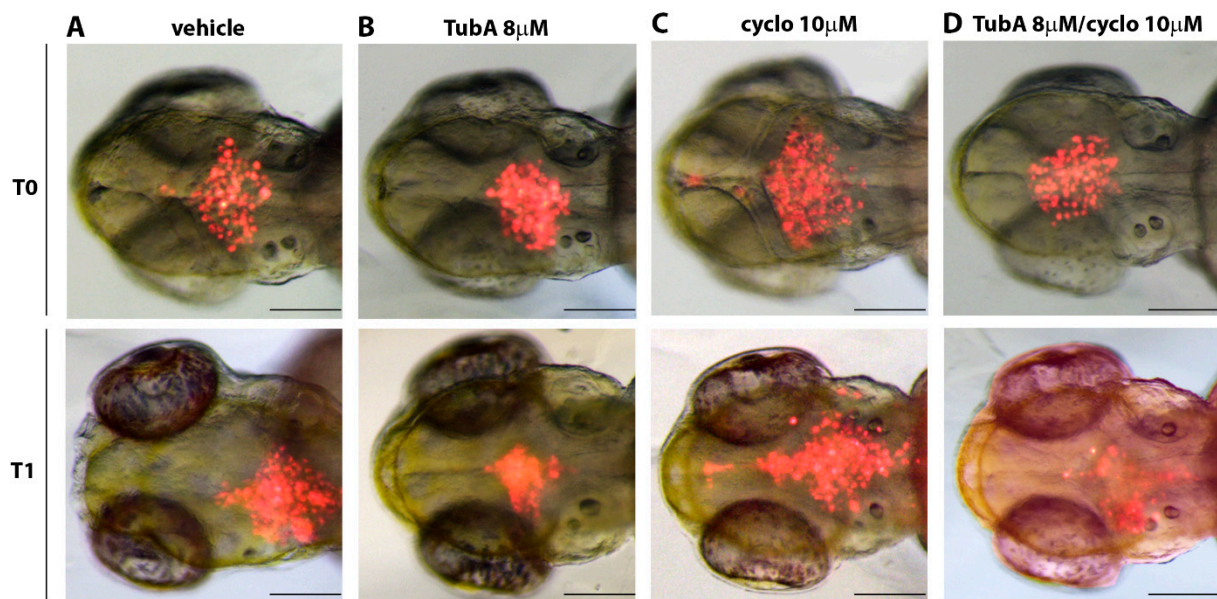

**Supplementary Figure S3. Xenotransplantation of U87 GBM cells treated with *Hh* and HDAC6 inhibitors in zebrafish hindbrain** A) Representative images of the head region of zebrafish embryos xenotransplanted with la-belled U87-MG cells pre-treated with B) CT, C) T8, D) C10 and E) T8C10 a T0 or T1 (24 hpi). Scale bare indicates 100  $\mu$ m.

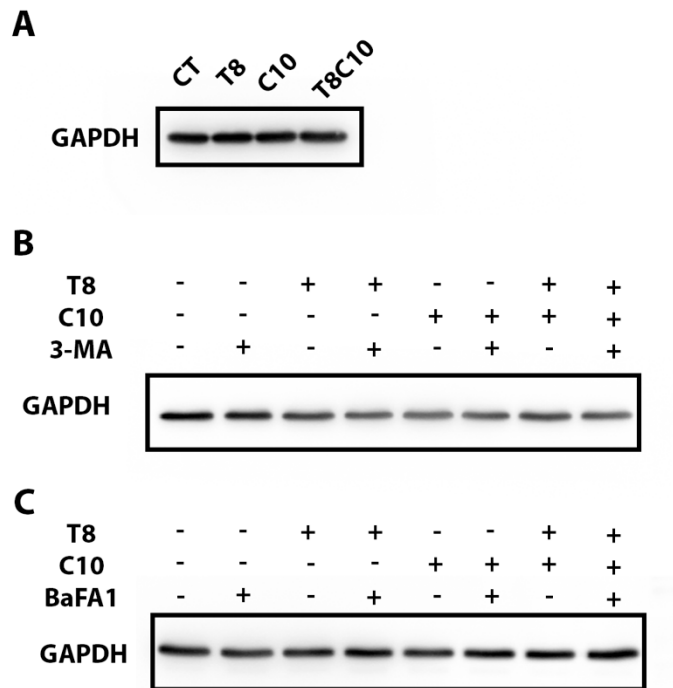

**Supplementary Figure S4. Western blot analyses of GAPDH in the U87-MG cell lines.** A) GAPDH levels of U87-MG cell line used in the experiment for the analyses of pERK and pAKT (Figure 1G) and GAPDH levels of U87-MG cell line in the experiments with the treatment with B) 3-MA (Figure 2A) and C) BafA1 (Figure 2B). CT: vehicle; TubA: TubastatinA; cyclo: cyclopamine; 3-MA: 3-methyladenine; BafA1: Bafilomycin A1. + and – indicate the presence or the absence of the chemical in the cell medium respectively.

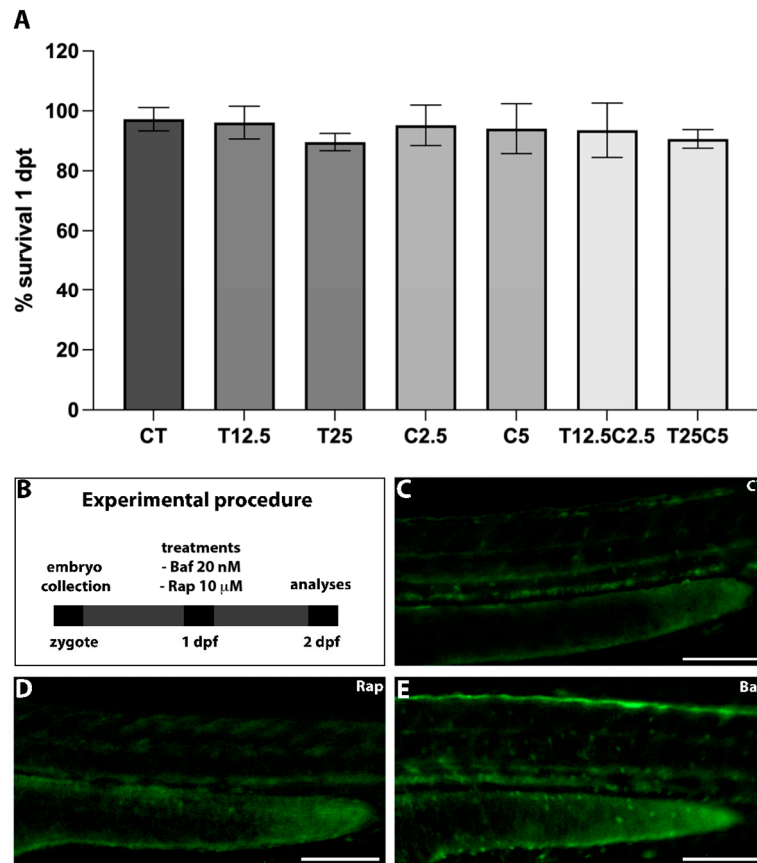

**Supplementary Figure S5. Setting doses for pharmacological treatment and effect of autophagy modulators in zebrafish embryos** **A)** Survival analyses of embryos treated with different concentration of TubA and cyclo, alone or in combination setting. **B)** Schematic representation of the pharmacological treatment with autophagy modulators in the Tg(*CMV-lc3b:GFP*) line. **C-E)** Representative images of the trunk region of embryos treated with **B)** CT; **C)** 1  $\mu$ M Rap; **D)** 20 nM BafA1. Scale bar indicates 100  $\mu$ m. CT: control; T: TubastatinA; C: cyclopamine; Rap: rapamycin; BafA1: Bafilomycin A1.
